# Supplementary material for: An Electrical Contacts Study for Tetrahedrite-Based Thermoelectric Generators
Source: MDPI journal article supplement (doi:10.3390/ma15196698), 2022-09-27
Supplement: s1 [file s1]

# An Electrical Contacts Study for Tetrahedrite-Based Thermoelectric Generators

Rodrigo Coelho <sup>1</sup>, Yassine De Abreu <sup>2</sup>, Francisco Carvalho <sup>3</sup>, Elsa Branco Lopes <sup>1</sup> and António Pereira Gonçalves <sup>1,\*</sup>

<sup>1</sup> C2TN, DECN, Instituto Superior Técnico, Universidade de Lisboa, Campus Tecnológico e Nuclear, 2695-066 Bobadela, Portugal

<sup>2</sup> CESI, Campus D'enseignement Supérieur et de Formation Professionnelle, 15C Av. Albert Einstein, 69100 Villeurbanne, France

<sup>3</sup> DEEC, Instituto Superior Técnico, Universidade de Lisboa, 1049-001 Lisboa, Portugal

\* Correspondence: apg@ctn.tecnico.ulisboa.pt; Tel.: +351219946182

Presented in Figure S1 are scanning electron microscopy (SEM) images of one tetrahedrite leg analyzed in multiple zones to check the porosity. In Table S1, the values analyzed with the *ImageJ* software are resumed. According to the SEM analysis, the materials have a porosity  $\geq 88\%$ .

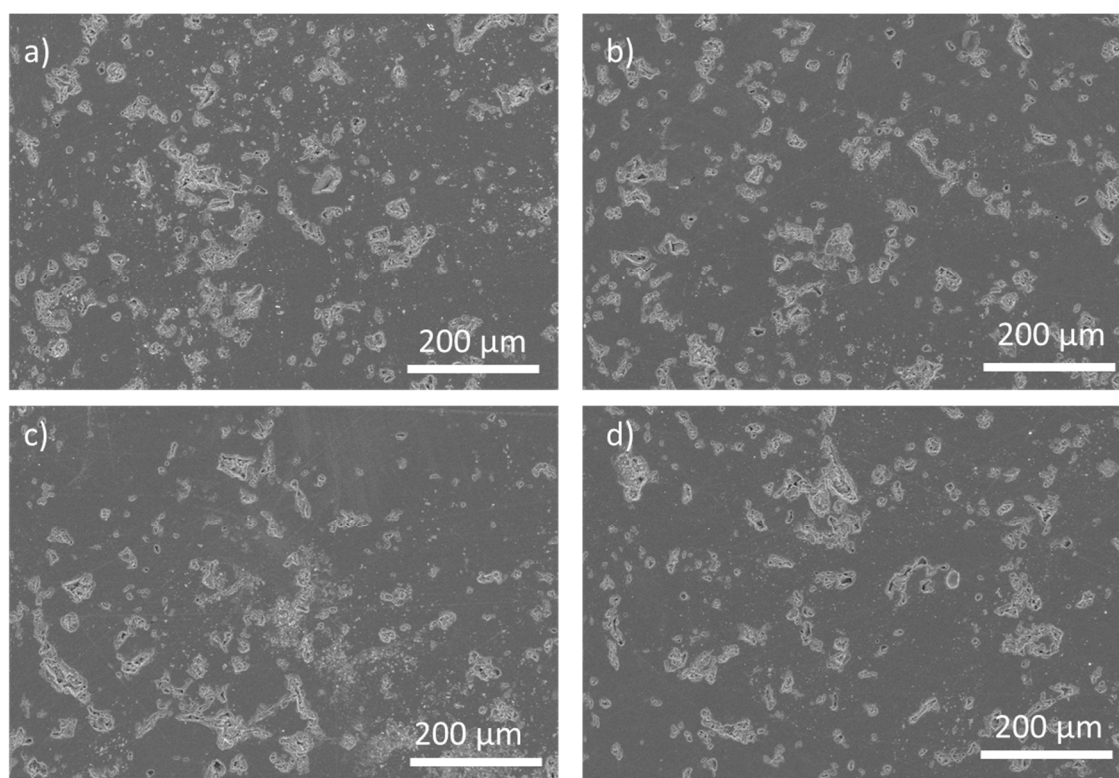

**Figure S1.** SEM micrographs of a sample. Different analyzed zones (a–d) acquired at 200x magnification in a secondary electron mode.

**Table S1.** Porosity analysis of the zones presented in Figure S1 performed with *ImageJ* software.

|                         | Porosity %<br>Zone 1 (a) | Porosity %<br>Zone 2 (b) | Porosity %<br>Zone 3 (c) | Porosity %<br>Zone 4 (d) |
|-------------------------|--------------------------|--------------------------|--------------------------|--------------------------|
|                         | 9.99                     | 12.14                    | 14.75                    | 11.76                    |
| Average                 | 12.16                    |                          |                          |                          |
| Standard deviation (SD) | 1.70                     |                          |                          |                          |

**Table S2.** Summary of the prepared samples indicating presence of visible cracks.

| Sample | Joining Material                          | Fixation Technique | Conditions               | Visible Cracks |
|--------|-------------------------------------------|--------------------|--------------------------|----------------|
| A      | No paints or solders<br>No graphite layer | HP                 | 56 MPa, 1 h 30 at 848 K  | No             |
| M1     | Ni conductive paint                       | Manual             | Manually pressed, ~5 min | No             |
| M2     | Water-based Ag Paint                      | Manual             | Manually pressed, ~5 min | No             |
| M3     | Ni Resin                                  | Manual             | Manually pressed, ~5 min | No             |
| M4     | Ag Resin                                  | Manual             | Manually pressed, ~5 min | No             |
| CP1    | Ni conductive paint                       | CP                 | 41 MPa, 6 h              | Yes            |
| CP2    | Water-based Ag Paint                      | CP                 | 16 MPa, 6 h              | No             |
| CP3    | Ni Resin                                  | CP                 | 28 MPa, 4 h              | Yes            |
| CP4    | Ag Resin                                  | CP                 | 32 MPa, 4 h              | No             |
| HP1    | Ni conductive paint                       | HP                 | 22 MPa, 1 h at 493 K     | Yes            |
| HP2    | Water-based Ag Paint                      | HP                 | 37 MPa, 1 h at 493 K     | Yes            |
| HP3    | Water-based Ag Paint                      | HP                 | 23 MPa, 1 h at 493 K     | Yes            |
| HP4    | Water-based Ag Paint                      | HP                 | 22 MPa, 1 h at 493 K     | No             |
| HP5    | Ag Resin                                  | HP                 | 20 MPa, 2 h at 493 K     | No             |
| HP6    | Ni Resin                                  | HP                 | 20 MPa, 2 h at 403 K     | Yes            |
| HP7    | Ni Resin                                  | HP                 | 15 MPa, 2 h at 403 K     | No             |
| HP8    | Zn-5wt% Al solder                         | HP                 | 22 MPa, 25 min at 732 K  | Yes            |
| HP9    | No paints or solders                      | HP                 | 56 MPa, 1 h 30 at 848 K  | No             |
| HP10   | No paints or solders                      | HP                 | 56 MPa, 1 h 30 at 848 K  | No             |

Figure S2 presents the X-ray diffractogram of Sample A, with tetrahedrite powder directly hot pressed to copper discs at 56 MPa for 1h and 30 min at 848 K. Signs of a Cu phase and secondary phases such as  $\text{Cu}_2\text{S}$ , Sb, and  $\text{Cu}_3\text{SbS}_3$  point to the reaction of the copper plates with the  $\text{Cu}_{11}\text{Mn}_1\text{Sb}_4\text{S}_{13}$  powder during sintering.

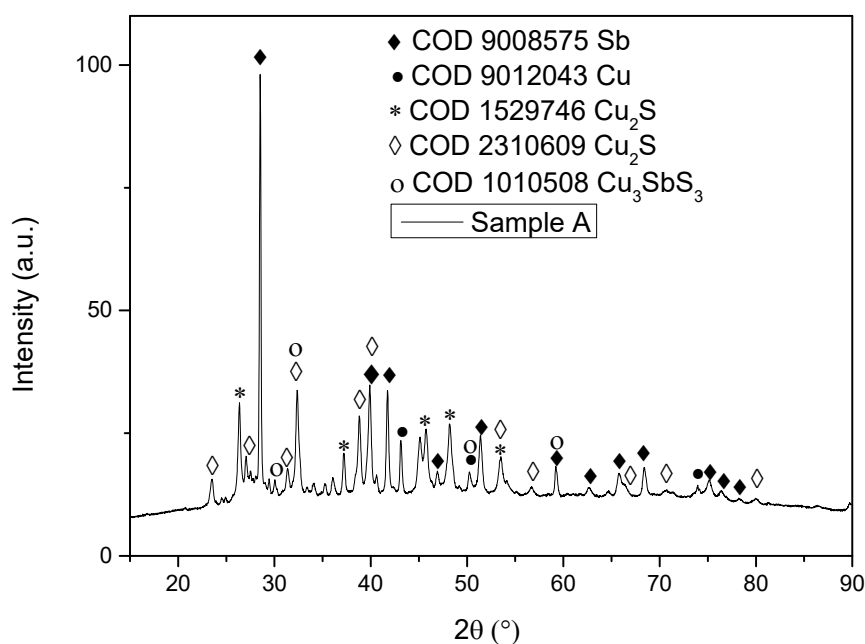**Figure S2.** XRD diffractogram of Sample A surface, corresponding to copper disks directly hot pressed to tetrahedrite powder.

In Figure S3, the powder X-ray diffractogram of a green tetrahedrite pellet and its graphite layer is presented. On both diffractograms, no other phases than the tetrahedrite and C graphite can be observed.

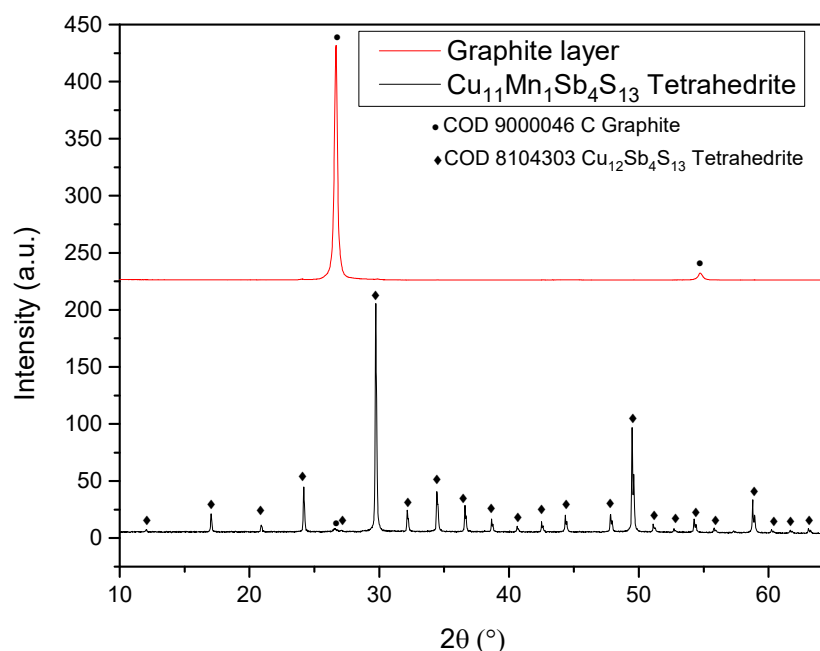

**Figure S3.** Powder XRD diffractogram of a green tetrahedrite pellet (hot pressed at 848 K and 56 MPa) bottom, and powder XRD diffractogram of a graphite layer after hot pressing with the tetrahedrite material.

The SEM EDS analysis of the cross-section of sample A is presented in Figure S4. According to the displayed micrographs, the Cu plate completely reacts with the tetrahedrite powder during sintering, with no traces of the tetrahedrite material being detected after hot pressing.

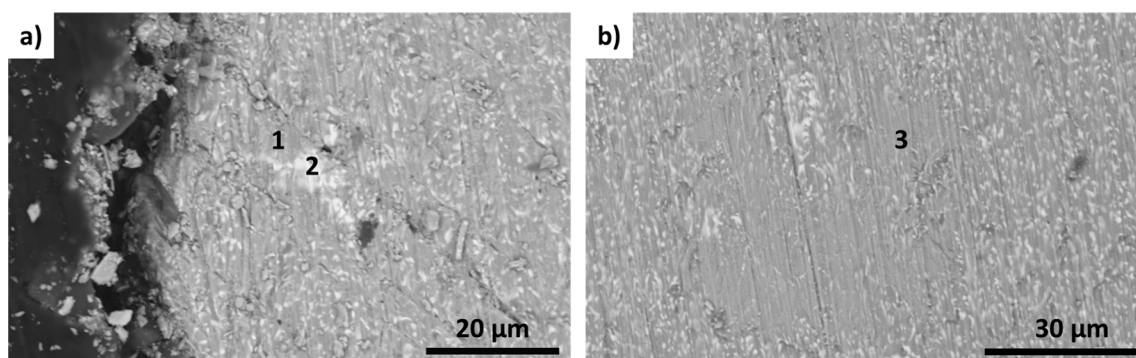

**Figure S4.** SEM-EDS analysis of the cross section of sample A: pellet edge (a); center of the pellet cross-section (b). Numbers correspond to the zones analyzed by EDS. BSE mode 1500× and 1200× magnification.

**Table S3.** EDS analysis of sample A.

| Zone | Phase Type        | Composition at. % |       |       |        |
|------|-------------------|-------------------|-------|-------|--------|
|      |                   | Cu                | Mn    | Sb    | S      |
| 1    | Cu <sub>2</sub> S | 60 (7)            | 3 (1) | 8 (1) | 29 (4) |

|   |                          |        |       |        |        |
|---|--------------------------|--------|-------|--------|--------|
| 2 | Sb and Cu <sub>2</sub> S | 38 (5) | 2 (1) | 35 (4) | 25 (3) |
| 3 | Cu <sub>2</sub> S        | 59 (7) | 1 (1) | 6 (1)  | 33 (4) |

The SEM-EDS analysis of sample HP6 is presented in Figure S5. On the presented micrograph, a clear interface can be observed between the Ni resin, the Cu contact, and the graphite layer. The numbers on the figure correspond to the EDS analyzed zones with the elementary analysis being presented below in Table S4. Zones 2 and 3 show some solubility between Ni and Cu at the paint region, with the copper element being detected even closer to the graphite layer. Interestingly, potassium from the paint seems to be capable of diffusing into the graphite layer (zone 3).

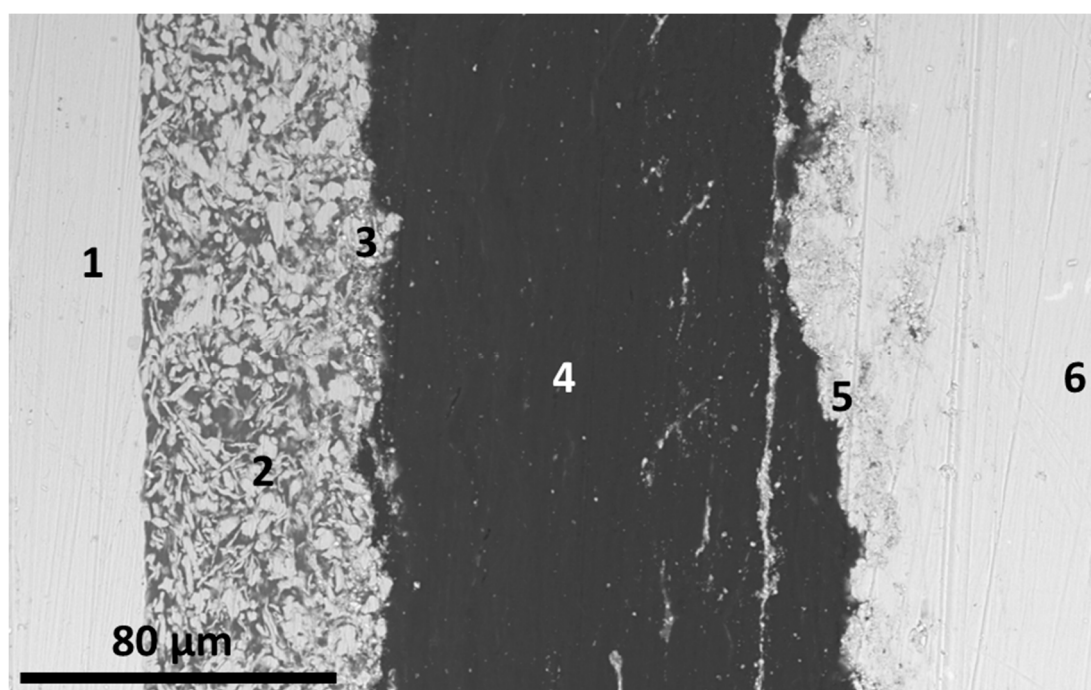

**Figure S5.** SEM-EDS analysis of sample HP6. Numbers correspond to the zones analyzed by EDS: copper contact zone 1, Ni resin zone 2 and 3, graphite layer zone 4, and tetrahedrite leg zones 5 and 6. BSE mode 460× magnification.

**Table S4.** EDS analysis of sample HP6.

| Zone | Phase Type                                                       | Composition at. % |       |        |        |        |        |       |        |         |
|------|------------------------------------------------------------------|-------------------|-------|--------|--------|--------|--------|-------|--------|---------|
|      |                                                                  | Cu                | Mn    | Sb     | S      | Si     | O      | K     | Ni     | C       |
| 1    | Cu                                                               | 100 (12)          | --    | --     | --     | --     | --     | --    | --     | --      |
| 2    | Ni, SiO <sub>2</sub> , and K                                     | 1 (1)             | --    | --     | --     | 18 (2) | 43 (5) | 6 (1) | 32 (4) | --      |
| 3    | Ni, Cu, SiO <sub>2</sub> , and K                                 | 6 (1)             | --    | 1 (1)  | 3 (1)  | 18 (2) | 33 (4) | 7 (1) | 32 (4) | --      |
| 4    | C                                                                | --                | --    | --     | --     | --     | --     | 1 (1) | --     | 99 (12) |
| 5    | Cu <sub>12</sub> Mn <sub>1</sub> Sb <sub>4</sub> S <sub>13</sub> | 40 (5)            | 3 (1) | 11 (1) | 45 (5) | 1 (1)  | --     | --    | --     | --      |
| 6    | Cu <sub>12</sub> Mn <sub>1</sub> Sb <sub>4</sub> S <sub>13</sub> | 39 (5)            | 3 (1) | 11 (1) | 47 (6) | --     | --     | --    | --     | --      |

Figure S6 displays the SEM-EDS analysis of sample HP8. On the referred image, a clear interface can be observed between the solder and the Cu contact. The marked zones were analyzed by EDS, these being the elementary composition of each spot displayed below in Table S5.

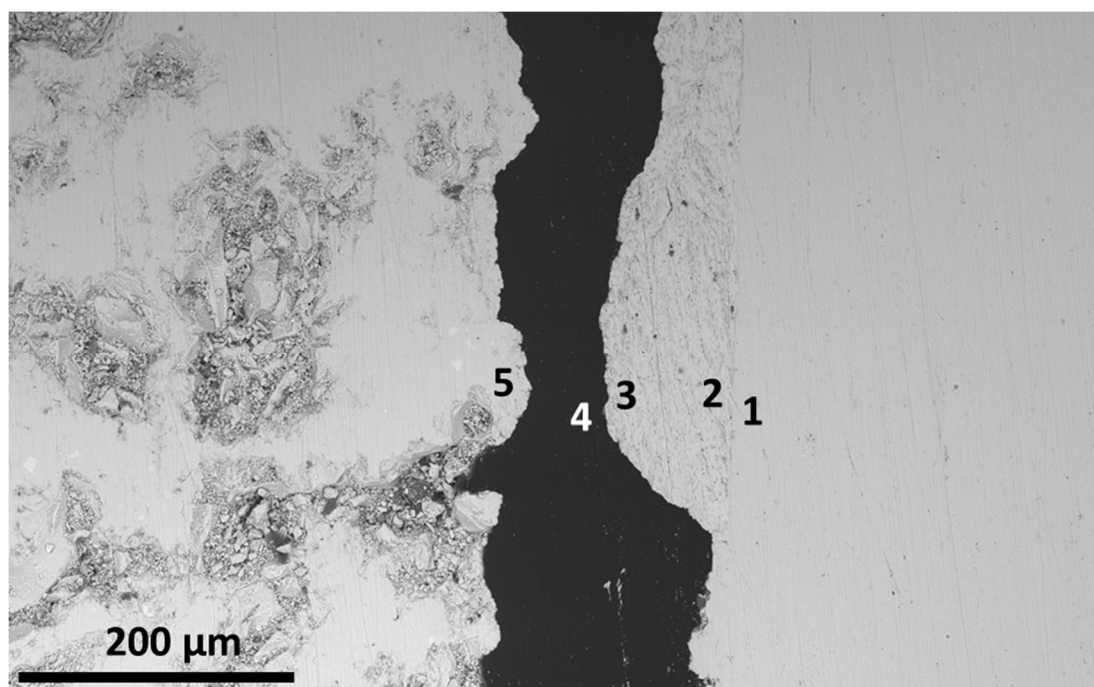

**Figure S6.** SEM-EDS analysis of sample HP8. Numbers correspond to the zones analyzed by EDS: copper contact zone 1, Zn-Al 5wt% zones 2 and 3, graphite layer zone 4, and tetrahedrite leg zones 5. BSE mode 160× magnification.

**Table S5.** EDS analysis of sample HP8.

| Zone | Phase Type                                         | Composition at. % |       |        |        |        |        |          |
|------|----------------------------------------------------|-------------------|-------|--------|--------|--------|--------|----------|
|      |                                                    | Cu                | Mn    | Sb     | S      | Zn     | Al     | C        |
| 1    | Cu                                                 | 100 (12)          | --    | --     | --     | --     | --     | --       |
| 2    | Zn-Al 5wt%                                         | 2 (1)             | --    | --     | 2 (1)  | 59 (7) | 37 (4) | --       |
| 3    | Zn-Al 5wt%                                         | --                | --    | --     | --     | 74 (9) | 26 (3) | --       |
| 4    | C                                                  | --                | --    | --     | --     | --     | --     | 100 (12) |
| 5    | Cu <sub>12</sub> MnSb <sub>4</sub> S <sub>13</sub> | 40 (5)            | 3 (1) | 11 (1) | 46 (6) | --     | --     | --       |

The SEM-EDS analysis of the sample HP4 (prepared by HP using Ag paint) is presented in Figure S7. A clear and thin interface between the paint the Cu plate can be observed. The atomic composition from the EDS analysis, which corresponds to Figure S6 numbers, is presented below in Table S6.

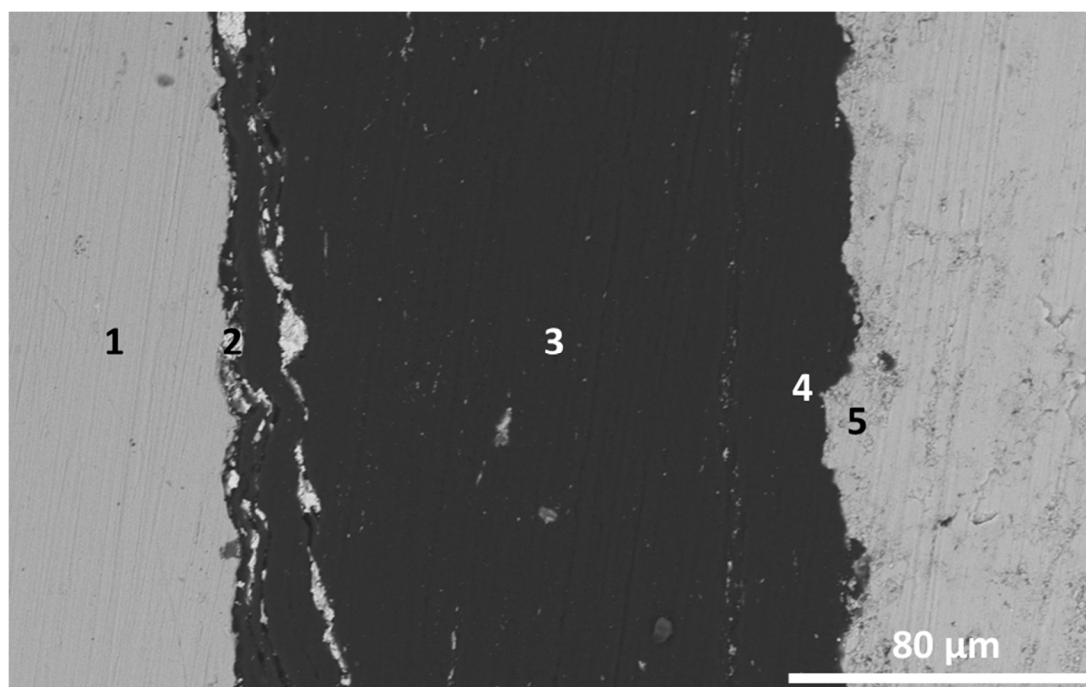

**Figure S7.** SEM-EDS analysis of sample HP4. Numbers correspond to the zones analyzed by EDS: copper contact zone 1, Ag paint zone 2, graphite layer zones 3 and 4, and tetrahedrite leg zone 5. BSE mode 440× magnification.

**Table S6.** EDS analysis of Sample HP4.

| Zone | Phase Type                                 | Composition t. % |       |        |        |       |        |         |
|------|--------------------------------------------|------------------|-------|--------|--------|-------|--------|---------|
|      |                                            | Cu               | Mn    | Sb     | S      | O     | Ag     | C       |
| 1    | Cu                                         | 100 (12)         | --    | --     | --     | --    | --     | --      |
| 2    | Ag, Cu, and C                              | 3 (1)            | --    | --     | --     | --    | 55 (7) | 42 (5)  |
| 3    | C                                          | --               | --    | --     | --     | 3 (1) | --     | 97 (12) |
| 4    | C                                          | --               | --    | --     | --     | 3 (1) | --     | 96 (12) |
| 5    | $\text{Cu}_{12}\text{MnSb}_4\text{S}_{13}$ | 40 (5)           | 3 (1) | 11 (1) | 46 (6) | --    | --     | --      |
